# Supplementary material for: Genome-wide identification and expression analysis of the AT-hook Motif Nuclear Localized&nbsp;gene family in soybean
Source: Research Square preprint supplement (doi:10.21203/rs.3.rs-388275/v1), 2021-04-12
Supplement: Supplementary file 3 [file 503f186daa7ab85de1a04d8e.xlsx]

## Sheet: 工作表1
Table.7 The primers of qRT-PCR
Glyma.05G111500	F	ACCAACGTGGCTTACGAGAG	R	AGAAGGGTCAGGGAAAGGGT
Glyma.06G093400	F	TGCTGCTGCAAGGGTTATGC	R	CTCTAACCAACCAATCCCCACA
GmTUB	F	TCTTGGACAACGAAGCCATCT	R	TGGTGAGGGACGAAATGATCT
Glyma.20G087200	F	TGGGTAACAGTGGTGGTAATG	R	GTGGCCTCCATTAGGGATAAG
Glyma.18G231300	F	AGGCAATGACAAGGGGAACAT	R	TGCATGAGTGCATAGCAGGG
Glyma.07G072300	F	GTTGTGGTTTAGGGGGCACA	R	ACACCCACAATTCTCAGACACA
Glyma.17G155400	F	CAACGTGGCTTACGAGAGGT	R	CGTTCGTTCCAGTGGCTGAA
