# Supplementary material for: Genome-wide identification and expression analysis of the AT-hook Motif Nuclear Localized&nbsp;gene family in soybean
Source: Research Square preprint supplement (doi:10.21203/rs.3.rs-388275/v1), 2021-04-12
Supplement: Supplementary file 4 [file 70ae2160fcf52bf2e4f0c47b.xlsx]

## Sheet: 工作表1
Table 6 Types of gene replication
Gene Name	Gene Name	Duplication Type
Glyma.20G039200	Glyma.20G039300	tandem
Glyma.06G093400	Glyma.02G213500	segmental
Glyma.04G091600	Glyma.06G093400	segmental
Glyma.14G181200	Glyma.04G091600	segmental
Glyma.02G213500	Glyma.04G091600	segmental
Glyma.14G028600	Glyma.02G285500	segmental
Glyma.02G285500	Glyma.14G028600	segmental
Glyma.03G022700	Glyma.01G144400	segmental
Glyma.01G213100	Glyma.05G054200	segmental
Glyma.11G028800	Glyma.01G213100	segmental
Glyma.17G136600	Glyma.05G054200	segmental
Glyma.01G198800	Glyma.05G111500	segmental
Glyma.11G043100	Glyma.01G198800	segmental
Glyma.17G155400	Glyma.01G198800	segmental
Glyma.05G111500	Glyma.11G043100	segmental
Glyma.18G036200	Glyma.02G249800	segmental
Glyma.11G221200	Glyma.02G249800	segmental
Glyma.14G066800	Glyma.02G249800	segmental
Glyma.02G249800	Glyma.18G036200	segmental
Glyma.06G014600	Glyma.04G014600	tandem
Glyma.05G111800	Glyma.11G042900	segmental
Glyma.17G155200	Glyma.05G111800	segmental
Glyma.11G042900	Glyma.01G198900	segmental
Glyma.01G198900	Glyma.17G155200	segmental
Glyma.01G219600	Glyma.05G207300	segmental
Glyma.11G023900	Glyma.01G219600	segmental
Glyma.05G207300	Glyma.08G014000	segmental
Glyma.08G014000	Glyma.01G219600	segmental
Glyma.03G011200	Glyma.07G072300	segmental
Glyma.05G053800	Glyma.17G136200	segmental
Glyma.03G251800	Glyma.19G249200	segmental
Glyma.19G249200	Glyma.03G251800	segmental
