# Supplementary material for: Genome-wide identification and expression analysis of the AT-hook Motif Nuclear Localized&nbsp;gene family in soybean
Source: Research Square preprint supplement (doi:10.21203/rs.3.rs-388275/v1), 2021-04-12
Supplement: Supplementary file 5 [file 7aed820e520c8f8c7c00187f.xlsx]

## Sheet: Cellular Component
Table 4 The functional annotations of the AT-hook motif genes in soybean
Glyma Name	Annotation ID	Description
Glyma.01g143100	GO:0005634	nucleus
Glyma.01g144400	GO:0005634	nucleus
Glyma.01g198800	GO:0005634	nucleus
Glyma.01g198900	GO:0005634	nucleus
Glyma.01g213100	GO:0005634	nucleus
Glyma.01g219600	GO:0005634	nucleus
Glyma.02g213500	GO:0005634	nucleus
Glyma.02g249800	GO:0005634	nucleus
Glyma.02g285500	GO:0005634	nucleus
Glyma.03g011200	GO:0005634	nucleus
Glyma.03g022700	GO:0005634	nucleus
Glyma.03g023500	GO:0005634	nucleus
Glyma.04g014600	GO:0005634	nucleus
Glyma.04g091600	GO:0005634	nucleus
Glyma.05g053800	GO:0005634	nucleus
Glyma.05g054200	GO:0005634	nucleus
Glyma.05g111500	GO:0005634	nucleus
Glyma.05g111800	GO:0005634	nucleus
Glyma.05g207300	GO:0005634	nucleus
Glyma.06g014600	GO:0005634	nucleus
Glyma.06g093400	GO:0005634	nucleus
Glyma.07g072300	GO:0005634	nucleus
Glyma.07g230900	GO:0005634	nucleus
Glyma.08g014000	GO:0005634	nucleus
Glyma.09g153600	GO:0005634	nucleus
Glyma.09g245800	GO:0005634	nucleus
Glyma.09g260600	GO:0005634	nucleus
Glyma.09g268900	GO:0005634	nucleus
Glyma.10g008400	GO:0005634	nucleus
Glyma.10g065500	GO:0005634	nucleus
Glyma.10g167100	GO:0005634	nucleus
Glyma.10g178000	GO:0005634	nucleus
Glyma.10g188400	GO:0005634	nucleus
Glyma.11g023900	GO:0005634	nucleus
Glyma.11g028800	GO:0005634	nucleus
Glyma.11g042900	GO:0005634	nucleus
Glyma.11g043100	GO:0005634	nucleus
Glyma.11g189800	GO:0005634	nucleus
Glyma.11g221200	GO:0005634	nucleus
Glyma.13g150600	GO:0005634	nucleus
Glyma.14g028600	GO:0005634	nucleus
Glyma.14g181200	GO:0005634	nucleus
Glyma.16g204400	GO:0005634	nucleus
Glyma.17g136200	GO:0005634	nucleus
Glyma.17g136600	GO:0005634	nucleus
Glyma.17g155200	GO:0005634	nucleus
Glyma.17g155400	GO:0005634	nucleus
Glyma.18g036200	GO:0005634	nucleus
Glyma.18g220900	GO:0005634	nucleus
Glyma.18g231300	GO:0005634	nucleus
Glyma.18g247200	GO:0005634	nucleus
Glyma.20g038600	GO:0005634	nucleus
Glyma.20g039200	GO:0005634	nucleus
Glyma.20g039300	GO:0005634	nucleus
Glyma.20g039500	GO:0005634	nucleus
Glyma.20g040100	GO:0005634	nucleus
Glyma.20g087200	GO:0005634	nucleus
Glyma.20g202300	GO:0005634	nucleus
Glyma.20g212200	GO:0005634	nucleus
Glyma.20g222000	GO:0005634	nucleus
Glyma.01g143100	GO:0005654	nucleoplasm
Glyma.01g198800	GO:0005654	nucleoplasm
Glyma.03g023500	GO:0005654	nucleoplasm
Glyma.05g053800	GO:0005654	nucleoplasm
Glyma.09g268900	GO:0005654	nucleoplasm
Glyma.10g065500	GO:0005654	nucleoplasm
Glyma.13g150600	GO:0005654	nucleoplasm
Glyma.17g136200	GO:0005654	nucleoplasm
Glyma.18g220900	GO:0005654	nucleoplasm
Glyma.01g143100	GO:0005730	nucleolus
Glyma.03g023500	GO:0005730	nucleolus
Glyma.05g053800	GO:0005730	nucleolus
Glyma.09g268900	GO:0005730	nucleolus
Glyma.10g065500	GO:0005730	nucleolus
Glyma.13g150600	GO:0005730	nucleolus
Glyma.17g136200	GO:0005730	nucleolus
Glyma.18g220900	GO:0005730	nucleolus
Glyma.01g143100	GO:0005737	cytoplasm
Glyma.01g198800	GO:0005737	cytoplasm
Glyma.03g023500	GO:0005737	cytoplasm
Glyma.05g053800	GO:0005737	cytoplasm
Glyma.05g111500	GO:0005737	cytoplasm
Glyma.09g245800	GO:0005737	cytoplasm
Glyma.09g268900	GO:0005737	cytoplasm
Glyma.10g065500	GO:0005737	cytoplasm
Glyma.11g043100	GO:0005737	cytoplasm
Glyma.13g150600	GO:0005737	cytoplasm
Glyma.17g136200	GO:0005737	cytoplasm
Glyma.17g155400	GO:0005737	cytoplasm
Glyma.18g220900	GO:0005737	cytoplasm
Glyma.18g247200	GO:0005737	cytoplasm
Glyma.01g143100	GO:0005739	mitochondrion
Glyma.03g023500	GO:0005739	mitochondrion
Glyma.05g053800	GO:0005739	mitochondrion
Glyma.09g268900	GO:0005739	mitochondrion
Glyma.10g065500	GO:0005739	mitochondrion
Glyma.13g150600	GO:0005739	mitochondrion
Glyma.17g136200	GO:0005739	mitochondrion
Glyma.18g220900	GO:0005739	mitochondrion
Glyma.01g198900	GO:0005829	cytosol
Glyma.04g014600	GO:0005829	cytosol
Glyma.05g111800	GO:0005829	cytosol
Glyma.06g014600	GO:0005829	cytosol
Glyma.11g042900	GO:0005829	cytosol
Glyma.17g155200	GO:0005829	cytosol
Glyma.03g011200	GO:0005886	plasma membrane
Glyma.07g072300	GO:0005886	plasma membrane
Glyma.09g260600	GO:0005886	plasma membrane
Glyma.18g231300	GO:0005886	plasma membrane

## Sheet: Biological Process
Glyma Name	Annotation ID	Description
Glyma.01g144400	GO:0009908	flower development
Glyma.01g213100	GO:0009908	flower development
Glyma.03g022700	GO:0009908	flower development

## Sheet: Molecular Function
Glyma Name	Annotation ID	Description
Glyma.01g143100	GO:0003677	DNA binding
Glyma.01g198800	GO:0003677	DNA binding
Glyma.01g198900	GO:0003677	DNA binding
Glyma.01g219600	GO:0003677	DNA binding
Glyma.02g285500	GO:0003677	DNA binding
Glyma.03g011200	GO:0003677	DNA binding
Glyma.03g023500	GO:0003677	DNA binding
Glyma.03g251800	GO:0003677	DNA binding
Glyma.04g014600	GO:0003677	DNA binding
Glyma.05g053800	GO:0003677	DNA binding
Glyma.05g111800	GO:0003677	DNA binding
Glyma.05g207300	GO:0003677	DNA binding
Glyma.06g014600	GO:0003677	DNA binding
Glyma.07g072300	GO:0003677	DNA binding
Glyma.08g014000	GO:0003677	DNA binding
Glyma.09g153600	GO:0003677	DNA binding
Glyma.09g260600	GO:0003677	DNA binding
Glyma.09g268900	GO:0003677	DNA binding
Glyma.10g065500	GO:0003677	DNA binding
Glyma.11g023900	GO:0003677	DNA binding
Glyma.11g042900	GO:0003677	DNA binding
Glyma.11g189800	GO:0003677	DNA binding
Glyma.13g150600	GO:0003677	DNA binding
Glyma.14g028600	GO:0003677	DNA binding
Glyma.16g204400	GO:0003677	DNA binding
Glyma.17g136200	GO:0003677	DNA binding
Glyma.17g155200	GO:0003677	DNA binding
Glyma.18g220900	GO:0003677	DNA binding
Glyma.18g231300	GO:0003677	DNA binding
Glyma.19g249200	GO:0003677	DNA binding
Glyma.20g212200	GO:0003677	DNA binding
Glyma.01g144400	GO:0003700	sequence-specific DNA binding transcription factor activity
Glyma.01g198800	GO:0003700	sequence-specific DNA binding transcription factor activity
Glyma.01g213100	GO:0003700	sequence-specific DNA binding transcription factor activity
Glyma.02g213500	GO:0003700	sequence-specific DNA binding transcription factor activity
Glyma.02g249800	GO:0003700	sequence-specific DNA binding transcription factor activity
Glyma.02g285500	GO:0003700	sequence-specific DNA binding transcription factor activity
Glyma.03g022700	GO:0003700	sequence-specific DNA binding transcription factor activity
Glyma.04g091600	GO:0003700	sequence-specific DNA binding transcription factor activity
Glyma.05g054200	GO:0003700	sequence-specific DNA binding transcription factor activity
Glyma.05g111500	GO:0003700	sequence-specific DNA binding transcription factor activity
Glyma.06g093400	GO:0003700	sequence-specific DNA binding transcription factor activity
Glyma.09g245800	GO:0003700	sequence-specific DNA binding transcription factor activity
Glyma.10g008400	GO:0003700	sequence-specific DNA binding transcription factor activity
Glyma.10g167100	GO:0003700	sequence-specific DNA binding transcription factor activity
Glyma.10g188400	GO:0003700	sequence-specific DNA binding transcription factor activity
Glyma.11g028800	GO:0003700	sequence-specific DNA binding transcription factor activity
Glyma.11g043100	GO:0003700	sequence-specific DNA binding transcription factor activity
Glyma.11g221200	GO:0003700	sequence-specific DNA binding transcription factor activity
Glyma.14g028600	GO:0003700	sequence-specific DNA binding transcription factor activity
Glyma.14g181200	GO:0003700	sequence-specific DNA binding transcription factor activity
Glyma.17g136600	GO:0003700	sequence-specific DNA binding transcription factor activity
Glyma.17g155400	GO:0003700	sequence-specific DNA binding transcription factor activity
Glyma.18g036200	GO:0003700	sequence-specific DNA binding transcription factor activity
Glyma.18g247200	GO:0003700	sequence-specific DNA binding transcription factor activity
Glyma.20g039500	GO:0003700	sequence-specific DNA binding transcription factor activity
Glyma.20g087200	GO:0003700	sequence-specific DNA binding transcription factor activity
Glyma.20g202300	GO:0003700	sequence-specific DNA binding transcription factor activity
Glyma.20g222000	GO:0003700	sequence-specific DNA binding transcription factor activity
Glyma.01g219600	GO:0005515	protein binding
Glyma.02g285500	GO:0005515	protein binding
Glyma.05g207300	GO:0005515	protein binding
Glyma.08g014000	GO:0005515	protein binding
Glyma.10g178000	GO:0005515	protein binding
Glyma.11g023900	GO:0005515	protein binding
Glyma.14g028600	GO:0005515	protein binding
