# Supplementary material for: Genome-wide identification and expression analysis of the AT-hook Motif Nuclear Localized&nbsp;gene family in soybean
Source: Research Square preprint supplement (doi:10.21203/rs.3.rs-388275/v1), 2021-04-12
Supplement: Supplementary file 7 [file efab2038c57b6b1ab39b8466.xlsx]

## Sheet: 工作表1
Table 3 E-value , Sites Width of AHLs conserved motif
	E-value	Sites	Width
motif1	6.0e-1101	62	32
motif2	1.0e-966	62	29
motif3	1.3e-650	50	29
motif4	1.7e-616	62	21
motif5	1.9e-302	61	15
motif6	2.3e-336	29	21
motif7	2e-120	52	8
motif8	3.5e-105	25	15
motif9	1.8e-68	8	29
motif10	5.1e-64	20	15
