# Supplementary material for: Genome-wide identification and expression analysis of the AT-hook Motif Nuclear Localized&nbsp;gene family in soybean
Source: Research Square preprint supplement (doi:10.21203/rs.3.rs-388275/v1), 2021-04-12
Supplement: Supplementary file 8 [file 0ceef780f162286d49bd3e76.xlsx]

## Sheet: 工作表1
Table 5.Annotation of genes present in co-expression network
Class	Gene ID	Gene describition	Biology Process
Type-I	Glyma.14G066800	AT-hook motif nuclear-localized protein 15	DNA-binding transcription factor activity
	Glyma.09G199800	AP2-like ethylene-responsive transcription factor AIL6	DNA binding
	Glyma.20G095500	DUF724 domain-containing protein 3	histone binding
	Glyma.17G136600	AT-hook motif nuclear-localized protein 24	DNA-binding transcription factor activity
	Glyma.01G165000	alpha-mannosidase	alpha-mannosidase activity
	Glyma.09G163500	NA	NA
	Glyma.02G281500	alpha-amylase inhibitor/lipid transfer/seed storage family protein	NA
	Glyma.13G260800	NA	NA
	Glyma.10G128200	HVA22-like protein e	6-phosphofructokinase activity
	Glyma.05G054200	AT-hook motif nuclear-localized protein 24	DNA-binding transcription factor activity
	Glyma.19G118400	WUSCHEL-related homeobox 11	DNA binding
	Glyma.18G063900	NA	NA
	Glyma.09G090600	uncharacterized LOC100790863	NA
	Glyma.14G096300	pyrophosphate--fructose 6-phosphate 1-phosphotransferase subunit beta	6-phosphofructokinase activity
	Glyma.08G080200	berberine bridge enzyme-like 8	FAD binding
	Glyma.03G192700	NA	ATP binding
	Glyma.03G088300	NA	NA
	Glyma.07G170100	NA	NA
	Glyma.17G166500	UDP-glycosyltransferase 84B2	quercetin 3-O-glucosyltransferase activity
	Glyma.14G028600	AT-hook motif nuclear-localized protein 16	DNA-binding transcription factor activity
	Glyma.04G005900	5'-methylthioadenosine/S-adenosylhomocysteine nucleosidase 2	catalytic activity
	Glyma.20G212200	AT-hook motif nuclear-localized protein 6	DNA binding
	Glyma.06G005700	5'-methylthioadenosine/S-adenosylhomocysteine nucleosidase 1	catalytic activity
	Glyma.06G005600	5'-methylthioadenosine/S-adenosylhomocysteine nucleosidase 1-like	catalytic activity
	Glyma.10G178000	AT-hook motif nuclear-localized protein 6	DNA binding
	Glyma.09G153600	AT-hook motif nuclear-localized protein 6	DNA binding
	Glyma.16G204400	AT-hook motif nuclear-localized protein 7	DNA binding
	Glyma.20G039300	AT-hook motif nuclear-localized protein 28	DNA-binding transcription factor activity
	Glyma.06G130400	NA	NA
	Glyma.08G357100	NA	cell fate determination
	Glyma.09G055200	NA	NA
	Glyma.08G358000	NA	NA
	Glyma.14G182200	NA	NA
	Glyma.03G075700	GDP-mannose transporter GONST3	antiporter activity
	Glyma.09G058200	defensin-like protein 183	Fungicide
	Glyma.20G067800	NA	hydrolase activity
	Glyma.08G350700	putative E3 ubiquitin-protein ligase RING1b	Metal-binding
	Glyma.05G071500	uncharacterized LOC106798883	NA
	Glyma.13G262900	F-box/FBD/LRR-repeat protein At3g14710	F-box domain-containing protein
	Glyma.02G104800	scopoletin glucosyltransferase	UDP-glycosyltransferase activity
	Glyma.19G053600	uncharacterized LOC106797433	mitochondrial cytochrome c oxidase assembly
	Glyma.19G092600	pectinesterase inhibitor-like	pectinesterase inhibitor activity
	Glyma.20G063400	NA	NA
	Glyma.10G125600	NA	NA
	Glyma.10G294000	high mobility group B protein 15	DNA binding
	Glyma.02G113200	NA	transferase activity
	Glyma.08G350700	putative E3 ubiquitin-protein ligase RING1b	Metal-binding
	Glyma.17G188200	beta-glucosidase BoGH3B	beta-glucosidase activity
	Glyma.08G235200	LBD domain-containing transcription factor	LOB domain-containing protein
Type-II	Glyma.20G212200	AT-hook motif nuclear-localized protein 6	DNA binding
	Glyma.05G140400	DELLA protein GAI 1	gibberellic acid mediated signaling pathway
	Glyma.02G285500	AT-hook motif nuclear-localized protein 16	DNA-binding transcription factor activity
	Glyma.08G095800	DELLA protein GAI1	gibberellic acid mediated signaling pathway
	Glyma.06G150000	carbamoyl-phosphate synthase small chain, chloroplastic	carbamoyl-phosphate synthase (glutamine-hydrolyzing) activity
	Glyma.14G028600	AT-hook motif nuclear-localized protein 16	DNA-binding transcription factor activity
	Glyma.05G207300	AT-hook motif nuclear-localized protein 5-like	DNA binding
	Glyma.03G011200	AT-hook motif nuclear-localized protein 9	DNA binding
	Glyma.08G014000	AT-hook motif nuclear-localized protein 5	DNA binding
	Glyma.17G155200	NA	DNA binding
	Glyma.10G148800	importin subunit alpha-2	NLS-bearing protein import into nucleus
	Glyma.01G219600	AT-hook motif nuclear-localized protein 5	DNA binding
	Glyma.15G144800	importin subunit alpha-2	NLS-bearing protein import into nucleus
	Glyma.05G053800	AT-hook motif nuclear-localized protein 1	DNA binding
	Glyma.09G153600	AT-hook motif nuclear-localized protein 6	DNA binding
	Glyma.09G105600	carbon catabolite repressor protein 4 homolog 1	poly(A)-specific ribonuclease activity
	Glyma.03G207300	carbon catabolite repressor protein 4 homolog 1	poly(A)-specific ribonuclease activity
	Glyma.02G169700	NA	poly(A)-specific ribonuclease activity
	Glyma.05G111800	AT-hook motif nuclear-localized protein 13	DNA binding
	Glyma.19G204800	carbon catabolite repressor protein 4 homolog 1	poly(A)-specific ribonuclease activity
	Glyma.07G072300	AT-hook motif nuclear-localized protein 9	DNA binding
	Glyma.11G042900	AT-hook motif nuclear-localized protein 8	DNA binding
	Glyma.01G198900	AT-hook motif nuclear-localized protein 8	DNA binding
	Glyma.17G136200	AT-hook motif nuclear-localized protein 1	DNA binding
	Glyma.09G260600	uncharacterized LOC100814615	DNA binding
	Glyma.18G231300	AT-hook motif nuclear-localized protein 9	DNA binding
	Glyma.16G204400	AT-hook motif nuclear-localized protein 7	DNA binding
	Glyma.07G153700	BAG family molecular chaperone regulator 4	adenyl-nucleotide exchange factor activity
	Glyma.01G123300	BAG and ubiquitin domain-containing protein	adenyl-nucleotide exchange factor activity
	Glyma.09G039600	mportin subunit alpha-2	NLS-bearing protein import into nucleus
	Glyma.17G031000	importin subunit alpha-2	NLS-bearing protein import into nucleus
	Glyma.03G051600	BAG family molecular chaperone regulator 4	adenyl-nucleotide exchange factor activity
	Glyma.03G208600	uncharacterized LOC102667761	BRCT domain-containing protein
	Glyma.20G239200	importin subunit alpha-2	NLS-bearing protein import into nucleus
	Glyma.06G075100	glucan endo-1,3-beta-glucosidase 5	glucan endo-1,3-beta-D-glucosidase activity
	Glyma.07G132100	kinesin-like protein KIN-10B	ATP binding
	Glyma.11G023900	AT-hook motif nuclear-localized protein 5	DNA binding
Type-III	Glyma.17G136200	AT-hook motif nuclear-localized protein 1	DNA binding
	Glyma.03G179700	zinc finger protein JACKDAW	DNA-binding transcription factor activity
	Glyma.13G139000	zinc finger protein JACKDAW	DNA-binding transcription factor activity
	Glyma.12G055600	DNA damage-repair/toleration protein DRT100	NA
	Glyma.10G051500	zinc finger protein JACKDAW	DNA-binding transcription factor activity
	Glyma.19G180400	zinc finger protein JACKDAW	DNA-binding transcription factor activity
	Glyma.17G257500	HVA22-like protein i	NA
	Glyma.18G279800	putative GDSL/SGNH-like acyl-esterase family protein	O-acetyltransferase activity
	Glyma.11G179200	receptor protein kinase TMK1	ATP binding
	Glyma.06G122200	sugar efflux transporter SWEET13	sugar transmembrane transporter activity
	Glyma.09G260600	uncharacterized LOC100814615	DNA binding
	Glyma.11G042900	AT-hook motif nuclear-localized protein 8	DNA binding
	Glyma.05G111800	AT-hook motif nuclear-localized protein 13	DNA binding
	Glyma.07G072300	AT-hook motif nuclear-localized protein 9	DNA binding
	Glyma.17G155200	NA	DNA binding
	Glyma.16G204400	AT-hook motif nuclear-localized protein 7	DNA binding
	Glyma.01G198900	AT-hook motif nuclear-localized protein 8	DNA binding
	Glyma.03G011200	AT-hook motif nuclear-localized protein 9	DNA binding
	Glyma.18G231300	AT-hook motif nuclear-localized protein 9	DNA binding
	Glyma.03G258300	auxin response factor 18	auxin-activated signaling pathway
	Glyma.09G243200	uncharacterized LOC100807657	mRNA binding
	Glyma.02G285500	AT-hook motif nuclear-localized protein 16	DNA-binding transcription factor activity
	Glyma.08G095800	DELLA protein GAI1	DNA-binding transcription factor activity
	Glyma.06G164800	mediator of RNA polymerase II transcription subunit 36a	histone-glutamine methyltransferase activity
	Glyma.05G140400	DELLA protein GAI 1	gibberellic acid mediated signaling pathway
	Glyma.14G028600	AT-hook motif nuclear-localized protein 16	DNA-binding transcription factor activity
	Glyma.09G196600	uncharacterized LOC100813911	GTPase activity
	Glyma.04G084200	probable transcriptional regulatory protein At2g25830	NA
	Glyma.19G249200	AT-hook motif nuclear-localized protein 14	DNA binding
	Glyma.02G272200	abscisic-aldehyde oxidase	Metal binding
	Glyma.18G220900	AT-hook motif nuclear-localized protein 1	DNA binding
	Glyma.09G248700	UPF0510 protein INM02-like	NA
	Glyma.11G225500	UDP-glycosyltransferase 76B1	quercetin 3-O-glucosyltransferase activity
	Glyma.13G150600	AT-hook motif nuclear-localized protein 1	DNA binding
	Glyma.13G237200	glyoxysomal processing protease, glyoxysomal	serine-type endopeptidase activity
	Glyma.18G010900	E3 ubiquitin-protein ligase AIRP2	ubiquitin protein ligase activity
	Glyma.06G142100	WRKY transcription factor 55	DNA-binding transcription factor activity
	Glyma.07G201900	FHA domain-containing protein At4g14490	mRNA binding
	Glyma.03G139900	NA	NA
	Glyma.11G059900	cell division cycle-associated 7-like protein	regulation of transcription
	Glyma.17G112700	ABC transporter F family member 4	ATP binding
	Glyma.05G151900	protein RALF-like 24	calcium-mediated signaling
	Glyma.04G139900	U3 small nucleolar ribonucleoprotein protein IMP4-like	snoRNA binding
	Glyma.03G257500	cytochrome b561 and DOMON domain-containing protein At3g61750	NA
