# Supplementary material for: Genome-wide identification and expression analysis of the AT-hook Motif Nuclear Localized&nbsp;gene family in soybean
Source: Research Square preprint supplement (doi:10.21203/rs.3.rs-388275/v1), 2021-04-12
Supplement: Supplementary file 9 [file 4229a311545995cf6e98b66a.xlsx]

## Sheet: 工作表1
Table 1. The length and the position of the AT-hook motif gene family of chromosomes
Type	Gene ID	Gene Location	Gene Length	CDS Length	Protein Length	PI	MW
AHL TypeⅠ	Glyma.20G038600	Chr20:5985361..5985945	585	585	194	8.84	20706.8
	Glyma.20G039500	Chr20:6424264..6425299	1036	519	172	6.96	18273.72
	Glyma.20G040100	Chr20:6927297..6928210	914	768	255	7.9	27471.6
	Glyma.07G230900	Chr07:41176872..41177633	762	762	258	9.42	27562.1
	Glyma.20G039200	Chr20:6293233..6293943	711	711	236	9.19	25372.55
	Glyma.20G039300	Chr20:6354437..6355147	711	711	236	8.79	25263.36
	Glyma.06G093400	Chr06:7353687..7356232	2546	855	284	6.79	29680.28
	Glyma.04G091600	Chr04:8052537..8054787	2251	843	280	6.59	29126.71
	Glyma.14G181200	Chr14:44412425..44413662	1238	771	256	8.95	27181.59
	Glyma.02G213500	Chr02:39966501..39967977	1477	816	271	7.78	28325.73
	Glyma.14G028600	Chr14:2074152..2074901	750	750	249	9.33	26365.24
	Glyma.02G285500	Chr02:46650504..46652113	1610	747	248	8.79	26209
	Glyma.03G022700	Chr03:2358393..2360007	1615	933	310	6.59	32358
	Glyma.01G144400	Chr01:47862376..47864806	2431	867	288	7.11	29581.95
	Glyma.01G213100	Chr01:54443421..54445622	2202	903	300	6.30	30910.3
	Glyma.11G028800	Chr11:2073771..2076640	2870	897	298	6.34	31034.59
	Glyma.05G054200	Chr05:4921245..4923175	1931	852	283	6.19	29746.22
	Glyma.17G136600	Chr17:11034761..11036699	1939	864	287	6.19	30264.7
	Glyma.18G247200	Chr18:53457034..53458586	1553	807	268	5.66	27850
	Glyma.09G245800	Chr09:46779198..46781547	2350	813	270	5.44	28184.34
	Glyma.01G198800	Chr01:53270493..53271245	753	753	250	6.1	26278.3
	Glyma.11G043100	Chr11:3156212..3156964	753	753	250	5.86	26240.4
	Glyma.17G155400	Chr17:13134432..13135858	1427	756	251	8.54	27140.41
	Glyma.05G111500	Chr05:29729388..29730984	1597	831	276	6.21	29364.85
	Glyma.18G036200	Chr18:2830848..2832883	2036	909	302	5.54	32201.29
	Glyma.11G221200	Chr11:31641566..31645035	3470	870	289	5.7	30635.88
	Glyma.14G066800	Chr14:5511222..5513114	1893	714	237	4.90	24853.35
	Glyma.02G249800	Chr02:43733046..43736212	3167	690	229	4.62	23864.19
	Glyma.10G167100	Chr10:40144743..40146501	1759	843	280	6.13	29230.44
	Glyma.20G222000	Chr20:45695377..45696210	834	834	277	5.98	28749.99
	Glyma.10G008400	Chr10:812787..815045	2259	813	270	5.41	27464.4
	Glyma.20G087200	Chr20:32632218..32634457	2240	807	268	5.49	27411.30
	Glyma.20G202300	Chr20:43941717..43944283	2567	912	303	8.73	30926.49
	Glyma.10G188400	Chr10:42143305..42144254	950	873	290	6.06	29511.80
AHL TypeⅡ	Glyma.06G014600	Chr06:1098115..1101942	3828	1068	355	10.16	36559.9
	Glyma.04G014600	Chr04:1119416..1123175	3760	1074	357	10.41	36813.52
	Glyma.05G111800	Chr05:29745228..29750532	5305	1089	362	9.19	36729.08
	Glyma.17G155200	Chr17:13112585..13118577	5993	1071	356	9.41	36028.7
	Glyma.11G042900	Chr11:3139534..3143800	4267	1020	253	8.81	26256.53
	Glyma.01G198900	Chr01:53282978..53287009	4032	1017	338	9.1	35208.29
	Glyma.01G219600	Chr01:54903061..54907533	4473	1074	357	9.73	36504.56
	Glyma.11G023900	Chr11:1720878..1725368	4491	1059	352	9.89	35948.07
	Glyma.05G207300	Chr05:38947662..38951376	3715	1059	352	9.64	36082.51
	Glyma.08G014000	Chr08:1080565..1085103	4539	1059	352	9.68	36040.37
	Glyma.03G011200	Chr03:1079855..1087560	7706	1023	340	9.69	34658.14
	Glyma.07G072300	Chr07:6560938..6567765	6828	1023	340	9.77	34917.49
	Glyma.09G260600	Chr09:47883584..47890792	7209	1026	341	9.86	35155.54
	Glyma.18G231300	Chr18:51979095..51987062	7968	1029	342	9.82	35223.57
	Glyma.11G189800	Chr11:26216330..26220334	4005	1113	370	6.07	38502.2
	Glyma.10G178000	Chr10:41125424..41132741	7318	993	330	7.73	34728.24
	Glyma.20G212200	Chr20:44876238..44882406	6169	993	330	6.55	34643.13
AHL TypeⅢ	Glyma.09G153600	Chr09:37642252..37648087	5836	1035	344	8.36	35572.19
	Glyma.16G204400	Chr16:36534047..36539263	5217	1035	344	7.82	35775.53
	Glyma.05G053800	Chr05:4865327..4870695	5369	984	327	9.04	33433.79
	Glyma.17G136200	Chr17:10982415..10988350	5936	996	331	9.34	34087.76
	Glyma.01G143100	Chr01:47640893..47648188	7296	1041	346	9	35718.2
	Glyma.03G023500	Chr03:2486917..2493916	7000	1041	346	9	35740.29
	Glyma.09G268900	Chr09:48639768..48644136	4369	1014	337	9.25	34996.59
	Glyma.18G220900	Chr18:50788395..50793712	5318	1017	284	9.55	29606.77
	Glyma.10G065500	Chr10:6273279..6277937	4659	1191	396	5.82	41543.51
	Glyma.13G150600	Chr13:26410180..26415049	4870	1140	379	6.76	39672.25
	Glyma.03G251800	Chr03:44744746..44751071	6326	1041	346	9.04	36513.61
	Glyma.19G249200	Chr19:49523295..49529220	5926	1086	361	9.04	38142.25
