# Supplementary material for: Genome-wide identification and expression analysis of the AT-hook Motif Nuclear Localized&nbsp;gene family in soybean
Source: Research Square preprint supplement (doi:10.21203/rs.3.rs-388275/v1), 2021-04-12
Supplement: Supplementary file 10 [file aaa2c46e6bafd4b73d2fea39.xlsx]

## Sheet: 工作表1
Table 2 The number of AHLs in Arabidopsis, Glycine max and Sorghum
Category	Arabidopsis	Glycine max	Sorghum
Clade A	15	34	14
Clade B	14	29	11
Total number	29	63	25
